# Supplementary material
Source: publisher figshare collection journal article supplement (https://gsapubs.figshare.com/ndownloader/files/24270971)
Supplement: Supplementary file 1 [file 24270971]

## Sheet: G48179
Kirkpatrick, H.M., Moon, S., Yin, A., and Harrison, T.M., 2020, Impact of fault damage on eastern Tibet topography: Geology, v. 48, https://doi.org/10.1130/G48179.1

## Sheet: Table S1
Table S1. Erosion rates and cosmogenic concentrations from previous studies
	Provided from previous studies											Recalcuated in this study
	Sampled location											Center of basin
Sample	Latitude (º)	Longitude (º)	10Be Concentration (atoms/g)	Error (atoms/g)	Standardizationa	Topographic shieldingb	Density (g/cm3)	Erosion rate (mm/yr)	Uncertainty (mm/yr)	AMS facility		Latitude (º)	Longitude (º)	Standardization	Topographic shielding	Density (g/cm3)	Erosion rate (mm/yr)	Uncertainty (mm/yr)
Average LM253 and SC082	31.0573	103.485	-	-	-	-	-	-	-	Tandetron Accelerator Mass Spectrometry facility		31.0688	103.106	07KNSTD	0.91362	2.7	0.3885	0.0819
LM259	31.488	103.58	43250	12550	NIST_27900	0.909601	2.65	0.68	0.26	Tandetron Accelerator Mass Spectrometry facility		31.5768	103.047	07KNSTD	0.920934	2.7	0.445	0.133
SC004	30.7608	103.469	61910	15590	NIST_27900	0.927283	2.65	0.18	0.06	Tandetron Accelerator Mass Spectrometry facility		30.7871	103.299	07KNSTD	0.937079	2.7	0.128	0.0336
SC016	31.241	103.792	78240	35070	NIST_27900	0.856653	2.65	0.23	0.12	Tandetron Accelerator Mass Spectrometry facility		31.3264	103.748	07KNSTD	0.858237	2.7	0.144	0.0654
SC031	31.459	104.001	28690	7220	NIST_27900	0.876169	2.65	0.72	0.25	Tandetron Accelerator Mass Spectrometry facility		31.5001	103.914	07KNSTD	0.873522	2.7	0.454	0.119
SC033	31.3175	103.996	39280	10960	NIST_27900	0.954793	2.65	0.2	0.07	Tandetron Accelerator Mass Spectrometry facility		31.3138	103.939	07KNSTD	0.963701	2.7	0.154	0.0446
SC059	31.0658	103.493	26190	5910	NIST_27900	0.924942	2.65	0.32	0.1	Tandetron Accelerator Mass Spectrometry facility		31.0712	103.508	07KNSTD	0.936962	2.7	0.234	0.0557
SC071	31.5159	104.113	56690	13120	NIST_27900	0.905514	2.65	0.25	0.08	Tandetron Accelerator Mass Spectrometry facility		31.5997	104.041	07KNSTD	0.928117	2.7	0.174	0.0425
SP20	32.11	102.86	44710	4340	NIST_27900	0.89	2.7	0.67	0.09	ASTER		32.0886	102.875	07KNSTD	0.91157	2.7	0.419	0.0514
SP19	32.19	102.65	93990	5210	NIST_27900	0.92	2.7	0.42	0.048	ASTER		32.1708	102.628	07KNSTD	0.948122	2.7	0.275	0.0257
SP18	32.27	102.5	199630	19580	NIST_27900	0.96	2.7	0.19	0.026	ASTER		32.2832	102.53	07KNSTD	0.971804	2.7	0.133	0.0165
SP17	32.61	102.33	645020	28660	NIST_27900	0.99	2.7	0.05	0.005	ASTER		32.5702	102.396	07KNSTD	0.994177	2.7	0.0399	0.0035
SP16	32.68	102.35	781290	25180	NIST_27900	0.98	2.7	0.04	0.004	ASTER		32.6662	102.408	07KNSTD	0.990028	2.7	0.0337	0.00277
SP15	32.97	102.63	548610	17470	NIST_27900	0.98	2.7	0.06	0.006	ASTER		32.9763	102.659	07KNSTD	0.985593	2.7	0.0477	0.00391
SP14	33.03	102.6	479820	15210	NIST_27900	0.98	2.7	0.07	0.007	ASTER		33.0207	102.678	07KNSTD	0.989482	2.7	0.0534	0.00437
SP13	33.04	102.9	368120	12480	NIST_27900	0.98	2.7	0.1	0.01	ASTER		32.9783	102.89	07KNSTD	0.987863	2.7	0.0736	0.00608
SP12	32.93	103.28	786940	39020	NIST_27900	0.99	2.7	0.05	0.005	ASTER		32.9016	103.279	07KNSTD	0.994243	2.7	0.0369	0.00335
SP11	32.92	103.4	251140	11000	NIST_27900	0.97	2.7	0.14	0.015	ASTER		33.0023	103.396	07KNSTD	0.978981	2.7	0.103	0.00896
SP10	32.92	103.4	169250	6310	NIST_27900	0.97	2.7	0.2	0.021	ASTER		32.9491	103.425	07KNSTD	0.982429	2.7	0.141	0.0119
SP09	32.89	103.46	192970	6290	NIST_27900	0.96	2.7	0.17	0.017	ASTER		32.9255	103.452	07KNSTD	0.976198	2.7	0.121	0.00988
SP08	32.85	103.56	154450	21200	NIST_27900	0.95	2.7	0.2	0.034	ASTER		32.8982	103.587	07KNSTD	0.971766	2.7	0.142	0.0223
SP07	32.68	103.6	85990	10700	NIST_27900	0.94	2.7	0.33	0.052	ASTER		32.6953	103.569	07KNSTD	0.962847	2.7	0.226	0.0328
SP06	32.6	103.61	124600	4030	NIST_27900	0.95	2.7	0.24	0.026	ASTER		32.6753	103.67	07KNSTD	0.972607	2.7	0.17	0.0139
SP05	32.58	103.62	156010	9380	NIST_27900	0.95	2.7	0.21	0.024	ASTER		32.5861	103.647	07KNSTD	0.971549	2.7	0.146	0.0141
SP04	32.33	103.72	54010	5290	NIST_27900	0.9	2.7	0.55	0.077	ASTER		32.3246	103.769	07KNSTD	0.922405	2.7	0.351	0.0433
SP03	32.26	103.75	84970	3440	NIST_27900	0.91	2.7	0.34	0.037	ASTER		32.2763	103.791	07KNSTD	0.940525	2.7	0.227	0.0193
SP02	32.22	103.77	65930	2670	NIST_27900	0.9	2.7	0.4	0.043	ASTER		32.224	103.804	07KNSTD	0.9227	2.7	0.262	0.0224
SP01	32.12	103.74	47820	2840	NIST_27900	0.89	2.7	0.56	0.065	ASTER		32.0847	103.774	07KNSTD	0.905785	2.7	0.355	0.034
Ma02	32.34	103.63	101630	6310	NIST_27900	0.92	2.7	0.27	0.03	ASTER		32.3905	103.631	07KNSTD	0.94738	2.7	0.183	0.0178
Ma03	32.34	103.55	128070	8330	NIST_27900	0.93	2.7	0.22	0.03	ASTER		32.2894	103.524	07KNSTD	0.955297	2.7	0.154	0.0153
Ma04	32.38	103.51	203170	10860	NIST_27900	0.93	2.7	0.15	0.02	ASTER		32.4186	103.539	07KNSTD	0.951175	2.7	0.104	0.00964
Ma05	32.38	103.47	137870	10010	NIST_27900	0.94	2.7	0.22	0.03	ASTER		32.2908	103.423	07KNSTD	0.962986	2.7	0.151	0.0158
Ma06	32.72	103.24	109670	9080	NIST_27900	0.97	2.7	0.3	0.04	ASTER		32.8038	103.253	07KNSTD	0.98053	2.7	0.209	0.0234
Ma07	32.1	102.75	91580	6210	NIST_27900	0.93	2.7	0.38	0.05	ASTER		31.9798	102.737	07KNSTD	0.95382	2.7	0.249	0.0252
Ma09	32.1	102.75	115140	7530	NIST_27900	0.92	2.7	0.3	0.04	ASTER		32.1067	102.679	07KNSTD	0.94538	2.7	0.197	0.0196
HS01	32.07	103.12	82840	7080	NIST_27900	0.9	2.7	0.35	0.05	ASTER		32.0084	103.107	07KNSTD	0.932014	2.7	0.226	0.0258
HS03	32.18	103.19	108540	7440	NIST_27900	0.92	2.7	0.26	0.03	ASTER		32.1896	103.263	07KNSTD	0.945584	2.7	0.175	0.0178
HS04	32.29	103.28	139970	7780	NIST_27900	0.93	2.7	0.23	0.03	ASTER		32.2613	103.324	07KNSTD	0.953006	2.7	0.155	0.0145
HS05	32.32	103.29	246210	11720	NIST_27900	0.93	2.7	0.12	0.01	ASTER		32.3254	103.345	07KNSTD	0.949346	2.7	0.0888	0.00791
HS06	32.06	103.26	156770	7950	NIST_27900	0.91	2.7	0.16	0.02	ASTER		32.0805	103.283	07KNSTD	0.930961	2.7	0.109	0.00989
HS07	31.86	103.28	93533	5920	NIST_27900	0.89	2.7	0.3	0.04	ASTER		31.8894	103.27	07KNSTD	0.910214	2.7	0.192	0.0188
wbo424	31.3	103.53	66500	3400	KNSTD	0.898038	2.6	0.323	0.033	PRIME lab, Purdue University		31.3157	103.542	KNSTD	0.91295	2.7	0.235	0.0214
wbo444	29.37	102.24	42400	4900	KNSTD	0.919551	2.6	0.243	0.04	PRIME lab, Purdue University		29.3775	102.28	KNSTD	0.930911	2.7	0.197	0.0271
wbo445	29.5	102.18	19500	1700	KNSTD	0.909731	2.6	0.573	0.079	PRIME lab, Purdue University		29.5041	102.201	KNSTD	0.923919	2.7	0.434	0.0499
wbo448	29.91	102.19	65800	2400	KNSTD	0.883897	2.6	0.455	0.039	PRIME lab, Purdue University		29.928	102.12	KNSTD	0.89976	2.7	0.276	0.023
wbo450	30.23	102.18	84400	3700	KNSTD	0.908915	2.6	0.326	0.031	PRIME lab, Purdue University		30.2187	102.137	KNSTD	0.924071	2.7	0.215	0.0187
wbo501	31.56	103.49	89600	3600	KNSTD	0.864328	2.6	0.241	0.022	PRIME lab, Purdue University		31.5203	103.476	KNSTD	0.869433	2.7	0.159	0.0136
wbo502	31.76	102.74	202300	5800	KNSTD	0.944849	2.6	0.216	0.017	PRIME lab, Purdue University		31.7711	102.77	KNSTD	0.953138	2.7	0.147	0.0118
wbo514	31.75	102	211500	5300	KNSTD	0.928123	2.6	0.164	0.012	PRIME lab, Purdue University		31.7196	101.958	KNSTD	0.937247	2.7	0.114	0.009
wbo515	31.42	102.05	170900	4500	KNSTD	0.937949	2.6	0.156	0.012	PRIME lab, Purdue University		31.442	102.013	KNSTD	0.947693	2.7	0.113	0.00902
wbo519	31.02	102.28	178000	6600	KNSTD	0.91898	2.6	0.154	0.013	PRIME lab, Purdue University		30.9935	102.267	KNSTD	0.931021	2.7	0.114	0.00954
wbo524	30.38	102.13	45800	1800	KNSTD	0.871832	2.6	0.549	0.049	PRIME lab, Purdue University		30.3757	102.082	KNSTD	0.879872	2.7	0.35	0.0297
wbo529	30.1	102.06	57700	3700	KNSTD	0.887219	2.6	0.582	0.066	PRIME lab, Purdue University		30.1186	102.071	KNSTD	0.877125	2.7	0.342	0.0338
wbo530	30.08	102.07	74300	3600	KNSTD	0.862753	2.6	0.487	0.048	PRIME lab, Purdue University		30.0503	102.054	KNSTD	0.879841	2.7	0.284	0.0253
wbo551	29.34	102.25	96500	8600	KNSTD	0.915606	2.6	0.163	0.023	PRIME lab, Purdue University		29.3049	102.178	KNSTD	0.929042	2.7	0.119	0.0139
wbo604	32.02	103.28	98800	4200	KNSTD	0.904896	2.6	0.286	0.026	PRIME lab, Purdue University		31.9716	103.224	KNSTD	0.913231	2.7	0.196	0.017
wbo605	32.13	102.89	112300	3600	KNSTD	0.933406	2.6	0.285	0.086	PRIME lab, Purdue University		32.1561	102.879	KNSTD	0.942061	2.7	0.196	0.016
wbo607	32.27	102.49	203000	6000	KNSTD	0.964978	2.6	0.203	0.061	PRIME lab, Purdue University		32.2832	102.53	KNSTD	0.971804	2.7	0.144	0.0116
wbo647	29.68	102.2	31200	1600	KNSTD	0.875277	2.6	0.477	0.049	PRIME lab, Purdue University		29.6938	102.242	KNSTD	0.891411	2.7	0.33	0.03
wbo651	31.29	102.05	267600	7500	KNSTD	0.933922	2.6	0.116	0.009	PRIME lab, Purdue University		31.3256	102.1	KNSTD	0.943526	2.7	0.084	0.00675
wbo302	30.27	101.53	1087600	19400	KNSTD	0.995727	2.6	0.036	0.002	PRIME lab, Purdue University		30.2538	101.572	KNSTD	0.998307	2.7	0.0308	0.00239
wbo305	29.89	101.54	1805000	48900	KNSTD	0.996449	2.6	0.024	0.002	PRIME lab, Purdue University		29.9009	101.506	KNSTD	0.999077	2.7	0.0208	0.00169
wbo316	29.43	101.23	196000	8500	KNSTD	0.937192	2.6	0.248	0.023	PRIME lab, Purdue University		29.4781	101.238	KNSTD	0.946389	2.7	0.164	0.0142
wbo439	29.41	101.23	124200	5400	KNSTD	0.934091	2.6	0.397	0.037	PRIME lab, Purdue University		29.3187	101.225	KNSTD	0.94496	2.7	0.248	0.0216
wbo505	32.21	101.61	189300	10000	KNSTD	0.934866	2.6	0.191	0.02	PRIME lab, Purdue University		32.1707	101.603	KNSTD	0.945238	2.7	0.133	0.0123
wbo506	31.89	100.75	274300	6500	KNSTD	0.946167	2.6	0.17	0.013	PRIME lab, Purdue University		31.9443	100.782	KNSTD	0.956174	2.7	0.118	0.00928
wbo508	32.2	101.02	968400	16100	KNSTD	0.968169	2.6	0.044	0.003	PRIME lab, Purdue University		32.2291	101.09	KNSTD	0.975483	2.7	0.0348	0.0027
wbo510	31.72	100.93	1024500	33400	KNSTD	0.983737	2.6	0.037	0.003	PRIME lab, Purdue University		31.5855	100.979	KNSTD	0.98522	2.7	0.0329	0.00271
wbo511	31.77	100.99	472800	9500	KNSTD	0.950964	2.6	0.097	0.007	PRIME lab, Purdue University		31.798	100.98	KNSTD	0.960811	2.7	0.0716	0.00558
wbo512	31.79	101.1	370200	8300	KNSTD	0.942939	2.6	0.111	0.008	PRIME lab, Purdue University		31.7626	101.087	KNSTD	0.953385	2.7	0.0813	0.00639
wbo513	31.77	101.37	267900	8800	KNSTD	0.929226	2.6	0.168	0.014	PRIME lab, Purdue University		31.8052	101.384	KNSTD	0.939233	2.7	0.113	0.00929
wbo518	30.95	101.72	127300	5000	KNSTD	0.90119	2.6	0.256	0.023	PRIME lab, Purdue University		30.9204	101.694	KNSTD	0.917796	2.7	0.173	0.0147
wbo521	30.54	101.62	142200	8100	KNSTD	0.952507	2.6	0.301	0.032	PRIME lab, Purdue University		30.5733	101.585	KNSTD	0.963601	2.7	0.205	0.0193
wbo522	30.68	101.75	78300	5200	KNSTD	0.887955	2.6	0.489	0.057	PRIME lab, Purdue University		30.6835	101.711	KNSTD	0.906988	2.7	0.306	0.0306
wbo536	30.04	100.98	346000	14100	KNSTD	0.935196	2.6	0.098	0.009	PRIME lab, Purdue University		30.0499	100.917	KNSTD	0.946057	2.7	0.0745	0.00639
wbo538	30.04	101.22	412200	11200	KNSTD	0.940483	2.6	0.095	0.007	PRIME lab, Purdue University		29.9965	101.226	KNSTD	0.95129	2.7	0.0713	0.00571
wbo544	29.98	101.58	808600	20300	KNSTD	0.957068	2.6	0.046	0.003	PRIME lab, Purdue University		30.0175	101.635	KNSTD	0.966806	2.7	0.0374	0.00298
wbo545	30.33	101.52	1581800	46300	KNSTD	0.979969	2.6	0.023	0.002	PRIME lab, Purdue University		30.3356	101.49	KNSTD	0.985634	2.7	0.0197	0.00161
wbo609	32.42	100.81	272000	6100	KNSTD	0.953204	2.6	0.17	0.051	PRIME lab, Purdue University		32.4108	100.749	KNSTD	0.962096	2.7	0.119	0.00931
wbo610	32.53	100.67	-	-	-	-	-	-	-	PRIME lab, Purdue University		32.5804	100.684	KNSTD	0.965821	2.7	0.0817	0.0111
wbo612	32.22	100.39	769800	30000	KNSTD	0.979894	2.6	0.061	0.018	PRIME lab, Purdue University		32.2793	100.433	KNSTD	0.985463	2.7	0.0475	0.00404
wbo613	32.61	101.19	389800	12400	KNSTD	0.942332	2.6	0.117	0.035	PRIME lab, Purdue University		32.6719	101.213	KNSTD	0.952373	2.7	0.0837	0.00684
wbo614	32.58	101.08	314800	10000	KNSTD	0.956696	2.6	0.129	0.039	PRIME lab, Purdue University		32.5846	101.051	KNSTD	0.965691	2.7	0.0942	0.0077
wbo616	32.43	101.05	228100	9100	KNSTD	0.969512	2.6	0.164	0.049	PRIME lab, Purdue University		32.4236	100.993	KNSTD	0.975889	2.7	0.12	0.0102
wbo617	32.34	101.22	548000	14600	KNSTD	0.968484	2.6	0.072	0.022	PRIME lab, Purdue University		32.3772	101.249	KNSTD	0.974994	2.7	0.0564	0.00451
wbo618	31.45	100.72	358300	12400	KNSTD	0.949987	2.6	0.109	0.033	PRIME lab, Purdue University		31.4307	100.758	KNSTD	0.959669	2.7	0.0815	0.00675
wbo619	31.03	101.07	174900	6200	KNSTD	0.951679	2.6	0.227	0.068	PRIME lab, Purdue University		31.0749	101.137	KNSTD	0.960895	2.7	0.156	0.013
wbo621	30.32	101.38	914200	29600	KNSTD	0.994203	2.6	0.048	0.014	PRIME lab, Purdue University		30.2984	101.344	KNSTD	0.997068	2.7	0.0398	0.00327
wbo622	30.31	101.42	633600	13200	KNSTD	0.992347	2.6	0.068	0.02	PRIME lab, Purdue University		30.2967	101.416	KNSTD	0.995748	2.7	0.0551	0.00431
wbo623	30.14	101.51	763700	15500	KNSTD	0.960782	2.6	0.044	0.013	PRIME lab, Purdue University		30.149	101.53	KNSTD	0.969695	2.7	0.0368	0.00289
wbo624	29.77	101.1	-	-	-	-	-	-	-	PRIME lab, Purdue University		29.7533	101.159	KNSTD	0.947644	2.7	0.0939	0.0152
wbo625	30.05	101.31	366000	12900	KNSTD	0.968942	2.6	0.119	0.036	PRIME lab, Purdue University		30.0322	101.312	KNSTD	0.970695	2.7	0.0895	0.00744
wbo626	30.06	101.36	900600	19700	KNSTD	0.991482	2.6	0.051	0.015	PRIME lab, Purdue University		30.0758	101.36	KNSTD	0.994859	2.7	0.0415	0.00326
wbo638	28.38	101.88	52600	2200	KNSTD	0.89641	2.6	0.397	0.036	PRIME lab, Purdue University		28.4022	101.909	KNSTD	0.908487	2.7	0.257	0.0221
wbo641	28.61	101.68	94600	4300	KNSTD	0.916897	2.6	0.301	0.029	PRIME lab, Purdue University		28.5688	101.646	KNSTD	0.929263	2.7	0.203	0.0178
wbo642	28.93	101.54	100200	3600	KNSTD	0.941404	2.6	0.384	0.115	PRIME lab, Purdue University		28.9359	101.469	KNSTD	0.953451	2.7	0.253	0.0211
wbo643	29.51	101.43	204800	7200	KNSTD	0.935402	2.6	0.225	0.067	PRIME lab, Purdue University		29.5368	101.455	KNSTD	0.94747	2.7	0.151	0.0125
wbo644	29.72	101.52	756300	22100	KNSTD	0.956416	2.6	0.056	0.017	PRIME lab, Purdue University		29.7065	101.544	KNSTD	0.96551	2.7	0.0453	0.00367
wbo645	29.93	101.39	1418700	24500	KNSTD	0.979487	2.6	0.029	0.009	PRIME lab, Purdue University		29.9866	101.371	KNSTD	0.984795	2.7	0.0243	0.0019
wbo653	31.03	101.87	99100	4800	KNSTD	0.914271	2.6	0.364	0.036	PRIME lab, Purdue University		31.0205	101.792	KNSTD	0.928544	2.7	0.233	0.0208
Averaged values
wbo610s	32.53	100.67	455900	15000	KNSTD	0.958529	2.6	0.099	0.03	PRIME lab, Purdue University		32.5804	100.684	KNSTD	0.965821	2.7	0.0729	0.00599
wbo610q	32.53	100.67	359600	12200	KNSTD	-	2.6	0.125	0.01	PRIME lab, Purdue University		32.5804	100.684	KNSTD	0.965821	2.7	0.0905	0.00747
wbo624s	29.77	101.1	318500	11000	KNSTD	0.935772	2.6	0.108	0.032	PRIME lab, Purdue University		29.7533	101.159	KNSTD	0.947644	2.7	0.0808	0.00669
wbo624q	29.77	101.1	232600	6700	KNSTD	-	2.6	0.148	0.012	PRIME lab, Purdue University		29.7533	101.159	KNSTD	0.947644	2.7	0.107	0.00864
LM253	31.0573	103.485	44900	8750	NIST_27900	0.903194	2.65	0.64	0.19	Tandetron Accelerator Mass Spectrometry facility		31.0688	103.106	07KNSTD	0.91362	2.7	0.405	0.0846
SC082	31.0573	103.485	48880	9190	NIST_27900	-	2.65	0.59	0.17	Tandetron Accelerator Mass Spectrometry facility		31.0688	103.106	07KNSTD	0.91362	2.7	0.372	0.0755
a Values in purple- NIST2700 is the same value as 07KNSTD within rounding error
b Numbers in purple color- come from Scheler et al., 2017
italicized: averages of two erosion rate measurements from same basin. Values are weighted means and weighted standard deviations

## Sheet: Table S2
Table S2. Erosion rates and cosmogenic concentrations measured in this study
Sample	River Name	Latitude (º)	Longitude (º)	Center Latitude (º)	Center Longitude (º)	Topograhic shielding	Quartz amount (g)	AMS facility	AMS ID	9Be carrier (mg)	10Be/9Be Ratio (x10-15)	s.d. (x10-15)	10Be atoms per gram SiO2 (x104)	s.d. (x104)	Erosion rate (mm/yr)	uncertainty (mm/yr)	Average current (nA)	Standardization
ET01	Fu jiang	32.1186	104.794	32.554	104.307	0.930646	5.557	PRIME lab	201701367	0.2607	13.3191	1.82648	3.77529	0.582312	0.289	0.0496	2028.13	07KNSTD
ET02	Fu jiang	32.3733	104.63	32.6162	104.195	0.925792	8.184	PRIME lab	201701368	0.2534	13.7354	1.82294	2.57782	0.383602	0.481	0.0801	1592.28	07KNSTD
ET03	Fu jiang	32.2873	104.794	32.5859	104.256	0.928772	21.288	PRIME lab	201701369	0.2435	37.2631	2.22826	2.75087	0.172272	0.416	0.0407	3985.34	07KNSTD
ET04	Fu jiang	31.891	104.783	32.5306	104.328	0.931379	20.457	PRIME lab	201701370	0.2478	34.9813	2.39861	2.72844	0.196083	0.383	0.0399	2507.01	07KNSTD
ET05	Fu jiang	32.4729	104.532	32.7431	104.316	0.925473	12.93	PRIME lab	201701371	0.2528	39.0622	5.33634	4.93709	0.698662	0.27	0.0433	1655.54	07KNSTD
ET06	Fu jiang	32.4699	104.52	32.5611	104.109	0.92446	13.422	PRIME lab	201701372	0.2421	17.8641	1.74439	1.99942	0.214165	0.622	0.0814	3287.45	07KNSTD
ET08	Fu jiang	32.5133	104.153	32.5314	103.957	0.907457	20.801	PRIME lab	201701374	0.235	48.8513	2.92475	3.59194	0.222287	0.447	0.0435	2983.82	07KNSTD
ET09	Fu jiang	32.5307	104.151	32.7343	103.98	0.915091	23.319	PRIME lab	201701379	0.2447	33.4288	2.53838	2.25475	0.179577	0.756	0.0828	2223.55	07KNSTD
ET10	Fu jiang	32.752	103.962	32.7921	103.88	0.92896	6.873	PRIME lab	201701380	0.2415	18.6659	2.11978	4.0832	0.504029	0.533	0.077	2249.99	07KNSTD
ET11	Bailong jiang	33.2907	104.181	33.3665	103.826	0.937698	10.647	PRIME lab	201701381	0.2542	38.9561	2.1756	6.01201	0.351277	0.305	0.029	3336.65	07KNSTD
ET12	Min jiang	32.9843	103.696	32.9611	103.807	0.944295	1.533	PRIME lab	201701382	0.2522	11.3323	2.36433	11.0545	2.62575	0.236	0.0588	1887	07KNSTD

## Sheet: Table S3
Table S3. Topographic, climatic, and ecologic variables and erosion coefficients for studied basins
Sample		Reference	Sampled location		Drainage area	Average basin elevation	s.d.	Relief (1 km)	s.d	Slope	s.d.	Channel steepness (Integral method)	s.e.	Channel steepness (Basin averaged)	s.d.	Distance to major faults	s.d.	Distance to major active faults	s.d.	Precipitation	s.d.	NDVI	s.d.	PGA	s.d	Erosion coefficient (K)	s.d.	Q1/3S2/3	s.d.	Erosion coefficient (Kss)	s.d	Q1/2S	s.d.	Erosion coefficient (Ksp)	s.d	Erosion coefficient (Knl)	s.d	Basins before and after 2008 Wenchuan EQ	Basins that have any portion of PGA > 0.34 g
			Latitude (º)	Longitude (º)	km2	m	m	m	m	unitless	unitless	m0.9	m0.9	m0.9	m0.9	km	km	km	km	mm/yr				(g)	(g)	10-6m0.1yr-1	10-6m0.1yr-1	m y-1/3	m y-1/3	10-6m0.37yr-0.79	10-6m0.37yr-0.79	m3/2y-1/2	m3/2y-1/2	10-6m0.25yr-0.75	10-6m0.25yr-0.75	10-6m0.56yr-1	10-6m0.56yr-1	(1 = before, 0 = after)	(1 = true, 0 = false)
LM253 and SC082		Godard et al. 2010	31.0573	103.485	1735.6	3546.71	876.359	963.914	236.037	0.675265	0.301364	277.718	1.28908	256.992	253.682	11.1954	9.33603	11.2903	9.45438	450.323	207.234	0.607574	0.280447	0.468966	0.187524	1.3989	0.294975	46.2978	32.6114	34.6897	16.0669	418.753	370.57	19.1236	8.67742	24.8351	2.55951	1	1
LM259		Godard et al. 2010	31.488	103.58	4614.9	3618.5	753.803	932.45	207.144	0.65163	0.274274	208.738	0.576517	241.9	200.263	29.76	13.4494	35.8705	12.9428	416.674	131.97	0.70655	0.214826	0.1766	0.072237	2.13186	0.637189	44.5723	28.0012	40.6969	17.835	321.697	341.527	24.9836	13.7442	32.7071	4.77797	1	1
SC004		Godard et al. 2010	30.7608	103.469	342.12	1899.37	621.041	760.638	190.139	0.562329	0.269928	144.512	0.886363	161.036	149.693	2.15292	1.66162	4.02941	2.88095	781.47	187.403	0.84155	0.0764601	0.721195	0.0954073	0.885743	0.232571	40.1547	28.228	12.5016	5.90947	288.844	302.908	7.58301	4.08891	11.2602	1.44506	1	1
SC016		Godard et al. 2010	31.241	103.792	131.884	2634.35	710.853	1192.69	250.939	0.891266	0.419417	231.12	2.42911	270.969	211.795	6.04584	2.26321	8.75711	3.95181	819.396	116.093	0.685107	0.15066	0.875328	0.043185	0.623054	0.283046	59.7058	36.0611	10.9545	5.21467	427.323	528.192	7.01701	4.60903	10.0699	2.23587	1	1
SC031		Godard et al. 2010	31.459	104.001	310.424	2957.69	773.323	1040.86	216.72	0.83926	0.406582	242.43	1.64423	227.915	306.443	2.89448	1.7996	10.1186	4.58969	506.834	178.349	0.647866	0.156825	0.815471	0.0724776	1.8727	0.491027	40.2471	39.0992	44.2774	28.0652	497.718	338.86	20.5027	7.46076	31.0153	3.9747	1	1
SC033		Godard et al. 2010	31.3175	103.996	58.0932	1421.53	295.817	593.127	113.543	0.443088	0.191283	106.124	1.96163	111.26	102.598	1.49723	1.00866	3.13692	1.13287	954.419	88.524	0.832977	0.102932	0.752002	0.0362156	1.45114	0.421119	33.3655	23.7334	16.9023	8.17729	221.869	230.24	10.4063	5.59229	15.7541	2.23451	1	1
SC059		Godard et al. 2010	31.0658	103.493	5.1597	1522.16	254.999	832.893	102.446	0.600983	0.184302	183.475	5.65323	171.245	55.8952	0.8889	0.600328	0.8889	0.600328	873.841	23.7101	0.819548	0.040757	0.9227	0.0104125	1.27538	0.306117	47.3593	10.4023	20.598	4.20258	109.765	331.515	22.4616	33.9428	18.3181	2.14892	1	1
SC071		Godard et al. 2010	31.5159	104.113	322.647	2293.8	756.427	861.97	211.392	0.611909	0.278506	205.91	1.66316	202.296	211.263	3.34378	2.56473	7.90605	5.02878	645.895	215.106	0.780042	0.151115	0.796131	0.0861347	0.84503	0.206514	42.4802	30.884	16.4022	7.92438	350.671	331.354	9.35759	4.55538	12.8744	1.53778	1	1
SP20		Ansberque et al. 2015	32.11	102.86	10.8054	3550.45	404.225	953.769	108.848	0.704108	0.283666	246.483	3.53781	226.386	105.674	36.7962	1.08554	36.7962	1.08554	477.111	27.4776	0.83282	0.0541695	0.0675112	0.00968899	1.69991	0.209956	46.4361	15.6913	37.3429	8.45645	157.844	330.223	33.5542	35.0749	28.3932	1.71399	0	0
SP19		Ansberque et al. 2015	32.19	102.65	22.5585	4100.81	260.338	701.099	86.5719	0.537024	0.187315	101.129	2.44996	109.368	67.3654	16.8337	1.42934	16.8337	1.42934	523.193	58.5155	0.655934	0.216004	0.06	1.72809e-15	2.7193	0.262531	29.8227	13.595	32.3943	9.49587	106.575	176.441	26.7884	22.1569	28.8031	1.35911	0	0
SP18		Ansberque et al. 2015	32.27	102.5	16.5807	4001.21	192.188	457.425	83.4441	0.41588	0.151106	71.3395	1.43516	79.4545	42.1015	3.00079	1.14579	3.00079	1.14579	443.279	10.9684	0.787226	0.0431722	0.06	1.53387e-15	1.86433	0.23431	22.4275	8.94734	18.7479	4.93405	58.8577	113.102	17.4213	16.7331	16.5206	1.01481	0	0
SP17		Ansberque et al. 2015	32.61	102.33	104.19	3671.16	101.202	193.961	71.3486	0.181664	0.119834	18.3049	0.28482	20.4897	25.9609	8.28612	4.04993	8.28612	4.04993	515.598	47.0259	0.802593	0.0334586	0.0600062	0.0003527	2.17975	0.194191	8.2819	7.98664	10.5345	6.42585	43.0112	31.8331	6.11152	2.27195	9.63577	0.419566	0	0
SP16		Ansberque et al. 2015	32.68	102.35	78.0597	3702.19	121.609	263.301	63.1773	0.242406	0.135905	25.1551	0.435581	26.9625	25.658	15.7501	2.74883	15.7501	2.74883	496.477	35.8581	0.815271	0.0370289	0.0598546	0.00169922	1.33969	0.112534	10.3036	7.81448	7.7538	3.72609	39.993	40.4534	5.35263	2.70951	6.96733	0.286047	0	0
SP15		Ansberque et al. 2015	32.97	102.63	14.3775	3722.56	107.369	306.83	29.1327	0.303835	0.129405	39.9209	0.473586	41.0367	20.4236	23.9082	1.03511	23.9082	1.03511	671.896	14.1787	0.817104	0.0295131	0.055223	0.00853	1.19486	0.0989642	16.5479	6.47352	8.14317	2.0503	35.37	71.6016	8.055	8.14015	7.86907	0.318548	0	0
SP14		Ansberque et al. 2015	33.03	102.6	75.2166	3687.63	123.071	280.968	62.329	0.249971	0.134039	26.934	0.340577	29.7197	26.0478	27.0399	2.89215	27.0399	2.89215	603.37	48.2148	0.833476	0.0265009	0.0534123	0.0094003	1.98263	0.164174	12.109	8.51575	11.0983	4.94976	46.4027	50.2815	7.87547	4.26873	10.6776	0.432145	0	0
SP13		Ansberque et al. 2015	33.04	102.9	29.2572	3853.3	153.397	279.439	78.0656	0.271774	0.139495	36.6119	0.418882	39.9911	30.6242	12.3284	2.93883	12.3284	2.93883	618.218	46.3925	0.706727	0.0570622	0.06	1.846e-15	2.01028	0.167652	15.0176	9.43294	13.3567	5.33042	52.2305	67.6059	10.2326	6.61989	12.6663	0.516288	0	0
SP12		Ansberque et al. 2015	32.93	103.28	19.845	3883.4	66.8404	202.529	55.6922	0.190047	0.109023	14.4096	0.132778	13.9779	13.0478	4.97716	1.58411	4.97716	1.58411	400.406	15.3226	0.71866	0.0365484	0.0772924	0.00684394	2.56079	0.233678	6.09735	4.99666	11.8152	6.13652	18.0541	19.1165	8.71467	4.61952	10.0168	0.44675	0	0
SP11		Ansberque et al. 2015	32.92	103.4	108.289	3836.1	162.726	389.363	63.282	0.347882	0.159078	48.3363	0.504004	51.3252	37.4801	7.14408	3.21705	7.14408	3.21705	553.216	82.3923	0.766537	0.0589616	0.0745355	0.00891263	2.1309	0.186695	17.7091	9.93327	16.8484	6.02434	62.4673	83.8983	13.097	8.79235	15.4753	0.662673	0	0
SP10		Ansberque et al. 2015	32.92	103.4	26.9892	3734.69	137.7	350.83	55.1217	0.328496	0.140061	43.2087	0.580717	43.1319	33.9482	1.84216	1.27236	1.84216	1.27236	583.93	46.733	0.797613	0.0456354	0.0794178	0.00336289	3.26323	0.278878	15.7258	9.28954	24.8562	9.34324	58.3761	70.7572	18.5451	11.2392	22.3782	0.934722	0	0
SP09		Ansberque et al. 2015	32.89	103.46	23.2794	3664.32	142.465	407.449	72.9885	0.377945	0.158121	50.5396	1.38091	56.6336	45.6688	2.02413	1.32052	2.02413	1.32052	596.868	39.8875	0.819377	0.0330542	0.0775852	0.00651758	2.39416	0.206145	18.7382	11.9987	19.1009	7.76703	77.7212	94.4302	13.7972	8.38041	17.788	0.748578	0	0
SP08		Ansberque et al. 2015	32.85	103.56	35.3079	3590.09	199.663	499.974	92.6327	0.406372	0.154578	74.0013	1.1326	77.6166	52.0691	2.13259	1.28624	2.13259	1.28624	488.202	49.4864	0.819852	0.0549274	0.08	1.94311e-16	1.91888	0.302774	22.1972	11.8209	20.1471	7.04639	81.2329	116.609	15.8388	11.4085	17.3256	1.33613	0	0
SP07		Ansberque et al. 2015	32.68	103.6	26.4222	3437.61	241.416	564.881	101.052	0.469508	0.170016	103.573	0.586442	103.822	59.8536	2.66148	1.72874	2.66148	1.72874	493.445	36.2409	0.814636	0.0586947	0.0828764	0.00701924	2.18203	0.316925	27.9264	12.2995	27.747	8.10529	94.2824	159.05	23.4029	19.7651	23.3962	1.66086	0	0
SP06		Ansberque et al. 2015	32.6	103.61	113.918	3558.57	313.582	546.557	117.742	0.40415	0.157157	98.4669	1.39627	114.337	72.7138	6.81498	4.23582	6.81498	4.23582	384.992	57.8567	0.783048	0.0887936	0.099754	0.00681502	1.72647	0.143271	26.7584	13.5424	21.441	6.9242	104.426	152.622	16.7292	12.2148	18.0392	0.731661	0	0
SP05		Ansberque et al. 2015	32.58	103.62	12.7899	3683.75	350.46	681.142	97.0547	0.436847	0.115853	237.536	1.56894	226.807	58.8169	15.1863	0.985154	15.1863	0.985154	450.524	17.2354	0.78566	0.0625809	0.105256	0.00880615	0.614644	0.0594981	47.6642	8.70014	12.7999	1.66505	90.5426	333.116	15.427	28.3203	10.074	0.476621	0	0
SP04		Ansberque et al. 2015	32.33	103.72	19.8855	3525.3	473.902	829.4	98.3755	0.664605	0.214036	200.904	2.15135	197.278	104.349	16.2306	1.54963	16.2306	1.54963	338.916	11.932	0.738274	0.188432	0.139984	0.00057073	1.7471	0.216337	37.8919	14.47	35.5574	8.98878	130.585	246.665	30.8965	29.1723	26.2851	1.59079	0	0
SP03		Ansberque et al. 2015	32.26	103.75	19.5048	3489.36	399.033	786.816	119.169	0.584667	0.224857	222.892	1.6985	204.548	135.854	16.0105	1.72684	16.0105	1.72684	407.951	39.3688	0.801621	0.126083	0.140017	0.000576271	1.01843	0.0869363	40.0885	19.7824	22.1938	7.00065	196.672	277.254	16.2898	11.4753	16.1578	0.674129	0	0
SP02		Ansberque et al. 2015	32.22	103.77	21.0114	3329.49	332.808	829.602	128.933	0.664175	0.254765	205.383	3.00402	195.062	142.378	15.8852	1.45637	15.8852	1.45637	435.46	12.9215	0.835579	0.0615835	0.160085	0.00129988	1.27567	0.110649	39.8482	20.5489	25.713	8.46674	206.864	276.832	18.3336	12.2627	19.4099	0.822859	0	0
SP01		Ansberque et al. 2015	32.12	103.74	76.0995	3359.56	380.325	852.393	147.379	0.719634	0.315822	189.544	1.67547	180.502	172.8	11.4512	1.86366	11.4512	1.86366	500.601	49.4791	0.849066	0.0442275	0.198169	0.011867	1.87292	0.18014	37.1962	28.1754	36.3849	17.4997	279.661	276.754	21.3727	10.5991	27.3518	1.28579	0	0
Ma02		Ansberque et al. 2015	32.34	103.63	29.6865	3370.32	328.298	676.138	89.752	0.551575	0.18425	145.067	1.68449	144.717	87.1423	10.5395	1.47526	10.5395	1.47526	487.82	22.4719	0.815782	0.0527308	0.121222	0.00628915	1.26148	0.123573	34.3717	16.0438	19.7128	5.92076	136.583	219.12	15.7516	12.6278	16.0684	0.769317	0	0
Ma03		Ansberque et al. 2015	32.34	103.55	69.5628	3461.45	340.045	641.107	105.207	0.512525	0.17785	135.51	1.01918	137.604	93.1883	4.38758	2.40546	4.38758	2.40546	412.697	24.3313	0.825353	0.0670883	0.12	3.46965e-15	1.13645	0.11323	30.9878	16.0757	17.7081	5.89206	138.892	190.85	13.1451	9.03304	13.98	0.680787	0	0
Ma04		Ansberque et al. 2015	32.38	103.51	45.1332	3533.39	258.091	628.468	104.861	0.536575	0.17988	148.664	1.40819	135.728	88.0035	3.8293	1.80303	3.8293	1.80303	462.713	21.0485	0.790289	0.0638897	0.115215	0.0148857	0.699563	0.0651818	32.6064	15.815	11.5812	3.6025	141.079	203.147	8.80826	6.33956	9.0231	0.41091	0	0
Ma05		Ansberque et al. 2015	32.38	103.47	174.83	3545.66	332.751	581.761	98.0129	0.466215	0.171879	111.309	0.711038	119.978	73.1673	11.8385	4.84814	11.8385	4.84814	321.534	38.3494	0.8021	0.07954	0.113182	0.00976756	1.35659	0.142212	26.6052	12.4842	19.1137	5.78859	94.1191	149.426	15.65	12.4202	15.0912	0.773222	0	0
Ma06		Ansberque et al. 2015	32.72	103.24	67.2057	3719.66	187.364	382.818	63.3085	0.342873	0.146528	52.1495	0.418567	56.068	43.5553	1.56387	1.27007	1.56387	1.27007	450.51	33.2207	0.808502	0.0420628	0.0743312	0.00901391	4.00771	0.449861	17.6043	10.2507	34.3156	12.8175	68.2444	83.5585	25.4285	15.5946	30.2573	1.65999	0	0
Ma07		Ansberque et al. 2015	32.1	102.75	235.516	3835.07	390.115	669.248	100.867	0.519589	0.184878	147.115	1.01366	160.066	107.871	39.6591	5.65139	39.6591	5.65139	479.66	88.8437	0.774599	0.122481	0.0776957	0.00638574	1.69255	0.171691	35.9091	18.7388	26.0931	8.73726	177.182	238.194	18.8233	12.6578	21.7143	1.07657	0	0
Ma09		Ansberque et al. 2015	32.1	102.75	77.3712	3800.33	389.07	739.579	107.34	0.566023	0.183396	181.324	1.6966	170.646	120.912	25.1991	2.90835	25.1991	2.90835	508.82	60.8122	0.741043	0.160559	0.0635071	0.00760582	1.08646	0.108571	38.8732	20.3789	19.6379	6.60088	204.87	267.93	13.8519	9.06211	15.5108	0.757579	0	0
HS01		Ansberque et al. 2015	32.07	103.12	64.962	3470.73	511.303	893.614	141.675	0.630888	0.198993	235.364	2.14549	226.602	160.549	52.4282	2.19903	52.4282	2.19903	390.163	47.3316	0.832512	0.0674883	0.0885736	0.00989836	0.960215	0.109966	42.3635	22.6452	21.341	7.34813	235.561	305.959	14.8222	9.63976	15.6642	0.87678	0	0
HS03		Ansberque et al. 2015	32.18	103.19	65.7315	3421.49	454.754	727.746	112.837	0.559188	0.208734	217.707	1.40776	193.163	117.384	30.4899	3.20907	30.4899	3.20907	664.014	84.0487	0.812305	0.0861387	0.099899	0.00141809	0.803831	0.0819262	46.25	21.5493	15.6362	4.69737	224.893	340.971	11.7458	8.90268	12.6006	0.627681	0	0
HS04		Ansberque et al. 2015	32.29	103.28	49.4019	3648.21	370.869	678.605	109.786	0.524126	0.194551	202.558	1.14414	184.619	94.611	21.3849	1.71119	21.3849	1.71119	465.369	91.8365	0.792868	0.0938011	0.103594	0.00891285	0.765213	0.0717148	39.7418	15.5077	15.2375	3.85163	148.731	265.315	12.7863	11.3927	11.5609	0.529555	0	0
HS05		Ansberque et al. 2015	32.32	103.29	69.1092	3574.41	281.652	637.742	100.404	0.539136	0.198646	156.322	1.98541	136.085	108.548	15.996	2.47022	15.996	2.47022	532.776	93.5056	0.805534	0.0754095	0.1097	0.0106677	0.568057	0.0511124	32.5125	19.5413	9.90658	3.79175	186.088	210.511	6.55069	3.70774	7.5175	0.330597	0	0
HS06		Ansberque et al. 2015	32.06	103.26	28.7469	3185.16	406.909	867.487	145.984	0.6315	0.239825	291.42	6.30443	247.93	177.734	34.9209	1.27334	34.9209	1.27334	471.014	32.2249	0.8232	0.0549579	0.114756	0.0123023	0.37403	0.0348886	48.6518	25.5918	9.43341	3.17198	284.591	374.773	6.50536	4.28322	6.8058	0.310275	0	0
HS07		Ansberque et al. 2015	31.86	103.28	19.1079	3409.94	466.454	981.216	123.965	0.728052	0.230696	310.69	4.76415	281.735	150.437	42.3844	1.02395	42.3844	1.02395	502.727	39.8191	0.833062	0.0638992	0.130598	0.00998421	0.617979	0.061248	55.366	21.5788	15.3171	3.87744	246.604	435.873	12.3078	10.8675	11.6188	0.562823	0	0
wbo424		Ouimet et al. 2009	31.3	103.53	15.876	3007.9	428.373	1003.72	141.619	0.724326	0.213597	268.852	4.61813	251.736	134.644	6.00273	1.18558	6.00273	1.18558	628.829	16.2082	0.820397	0.0822453	0.703602	0.0190184	0.874086	0.0810013	54.5363	19.9514	18.9267	4.49479	226.498	422.771	15.7171	14.6505	15.2626	0.691288	1	1
wbo444		Ouimet et al. 2009	29.37	102.24	23.6925	1933.43	344.444	803.696	119.514	0.621765	0.237402	221.597	5.18824	206.233	150.661	10.3469	1.43054	10.3469	1.43054	1105.22	131.22	0.873358	0.0536087	0.06	1.7489e-15	0.889	0.124052	55.3928	30.8763	15.7112	5.68215	354.046	461.715	10.544	6.89677	14.0624	0.959079	1	0
wbo445		Ouimet et al. 2009	29.5	102.18	10.0359	2010.68	451.086	971.312	198.434	0.656144	0.219815	209.625	3.34795	217.847	91.1751	7.11218	0.882918	7.11218	0.882918	1322.63	20.9198	0.8605	0.0681986	0.0426796	0.00681535	2.07037	0.24033	64.1054	18.2248	31.5696	6.09855	218.481	528.84	29.5529	35.721	31.8326	1.80603	1	0
wbo448		Ouimet et al. 2009	29.91	102.19	93.879	3418.66	881.468	1075.48	233.639	0.729001	0.290846	344.123	4.64759	295.418	202.111	6.93496	3.00985	6.93496	3.00985	561.83	231.068	0.354011	0.318815	0.0574702	0.00664827	0.802039	0.0677087	54.9235	26.715	22.1299	6.87944	308.435	444.225	15.8243	11.3871	15.8883	0.655567	1	0
wbo450		Ouimet et al. 2009	30.23	102.18	28.4067	3330.45	675.727	1062.87	173.944	0.677308	0.199266	417.003	3.73739	370.437	254.256	6.79359	1.16115	7.71409	1.94786	728.131	109.52	0.718506	0.21813	0.0668834	0.00950328	0.515584	0.0450813	72.0308	34.1151	14.5321	4.40812	509.713	660.701	9.59479	6.21745	11.2676	0.481526	1	0
wbo501		Ouimet et al. 2009	31.56	103.49	14.013	2864.69	574.605	1185.28	159.546	0.872547	0.328268	300.553	2.04901	303.496	247.862	2.9897	1.68711	12.1689	0.948814	411.801	51.5227	0.800341	0.0777987	0.347873	0.0131629	0.529024	0.0453934	50.8904	32.0491	13.3762	5.35519	352.79	419.47	8.52524	5.06915	9.77911	0.410117	1	1
wbo502		Ouimet et al. 2009	31.76	102.74	26.0172	4108.04	399.75	753.265	93.7303	0.517142	0.175143	244.998	2.7093	220.19	91.3373	42.6964	1.70089	42.6964	1.70089	605.354	30.9093	0.635466	0.239102	0.102005	0.00600757	0.600005	0.0486186	50.5039	15.1416	12.4262	2.42948	163.342	371.094	11.5727	13.1224	9.99082	0.395676	1	0
wbo514		Ouimet et al. 2009	31.75	102	23.4495	3665.31	457.446	788.745	180.267	0.604873	0.235254	298.468	4.941	267.01	201.02	23.4711	2.18681	23.4711	2.18681	682.09	86.4639	0.811104	0.0685895	0.06	1.7489e-15	0.38195	0.0308098	57.935	31.553	8.83836	3.06395	391.71	489.583	5.80156	3.62405	7.03534	0.277369	1	0
wbo515		Ouimet et al. 2009	31.42	102.05	14.1183	3240.57	440.438	767.372	115.205	0.566687	0.171204	230.184	2.6199	215.683	97.7989	37.7467	1.04523	37.7467	1.04523	1081.91	144.767	0.847814	0.0340073	0.08	3.47044e-16	0.490911	0.0395824	61.8548	19.0625	8.40688	1.68592	236.252	503.401	7.40029	7.87075	7.91774	0.312027	1	0
wbo519		Ouimet et al. 2009	31.02	102.28	9.1854	3383.5	361.77	851.889	96.8066	0.649726	0.193898	235.945	7.16825	223.604	126.842	49.8334	1.08709	49.8334	1.08709	421.167	49.9958	0.847668	0.0393311	0.119118	0.00410779	0.483163	0.0430153	43.4871	17.8685	10.5888	2.79701	183.944	304.424	8.45841	6.99132	7.89188	0.3434	1	0
wbo524		Ouimet et al. 2009	30.38	102.13	35.2431	3206.47	646.314	1154.95	184.28	0.815225	0.378044	337.52	4.34887	305.516	241.098	3.75304	1.78363	14.514	1.75735	995.453	154.747	0.733039	0.186039	0.0806204	0.00346785	1.03698	0.0890034	68.4846	40.4421	24.4213	9.17785	545.733	641.626	15.0964	8.87618	20.3399	0.853253	1	0
wbo529		Ouimet et al. 2009	30.1	102.06	9.1773	3642.45	572.023	1195.43	202.042	0.846528	0.367303	465.446	10.3385	422.977	318.387	6.48388	0.659713	13.5344	0.638195	441.473	25.8783	0.346594	0.165784	0.06	9.37164e-16	0.734779	0.07443	65.173	39.3368	24.6199	9.48543	460.11	602.954	16.0621	10.5288	16.986	0.840956	1	0
wbo530		Ouimet et al. 2009	30.08	102.07	14.4828	3757.84	782.13	1268.03	173.473	0.814677	0.315535	442.022	7.5785	389.812	194.22	7.92782	0.76462	11.967	1.17997	361.413	41.8989	0.615614	0.239914	0.0556264	0.00826933	0.642503	0.0582874	60.0416	20.8592	21.5285	4.86387	264.045	485.188	17.5952	16.1458	14.4658	0.641409	1	0
wbo551		Ouimet et al. 2009	29.34	102.25	75.9618	2431.99	752.618	889.158	174.903	0.615575	0.244623	251.532	2.97975	239.071	174.89	1.44317	1.22713	1.44317	1.22713	1149.07	116.082	0.722508	0.232526	0.052363	0.00971733	0.4731	0.0555447	62.9123	33.9206	8.75922	3.04401	417.792	555.297	5.86439	3.90285	7.98442	0.458168	1	0
wbo604		Ouimet et al. 2009	32.02	103.28	98.3988	3361.99	533.718	895.63	133.95	0.699942	0.263689	231.216	1.57011	222.533	217.759	42.71	2.75887	42.71	2.75887	482.022	38.4568	0.801995	0.104927	0.115334	0.00943827	0.847691	0.0737492	43.0459	31.0428	18.3227	8.38361	348.98	337.946	10.5662	5.12417	13.7034	0.582694	1	0
wbo605		Ouimet et al. 2009	32.13	102.89	11.502	3546.5	341.54	798.192	166.289	0.596956	0.181467	252.869	7.56114	239.219	191.137	31.2098	1.47613	31.2098	1.47613	625.267	28.8418	0.818799	0.047328	0.06	1.20779e-15	0.775105	0.067385	51.1268	29.7518	16.4408	6.08574	342.449	412.128	10.6662	6.4175	13.1168	0.557343	1	0
wbo607		Ouimet et al. 2009	32.27	102.49	16.5807	4001.21	192.188	457.425	83.4441	0.41588	0.151106	71.3395	1.43516	79.4545	42.1015	3.00079	1.14579	3.00079	1.14579	443.279	10.9684	0.787226	0.0431722	0.06	1.53387e-15	2.01852	0.167597	22.4275	8.94734	20.2984	5.20412	58.8577	113.102	18.8622	18.0952	17.887	0.725875	1	0
wbo647		Ouimet et al. 2009	29.68	102.2	14.1021	2392.77	539.456	1042.79	153.779	0.784154	0.277852	226.313	3.05919	222.611	134.264	1.76546	1.28169	1.76546	1.28169	960.704	13.3657	0.724477	0.186786	0.06	1.40206e-15	1.45816	0.134017	58.2133	24.5229	25.5076	6.92465	288.517	474.115	19.561	16.0579	23.3151	1.04733	1	0
wbo651		Ouimet et al. 2009	31.29	102.05	32.8455	3489.28	513.016	799.541	153.82	0.584158	0.192435	268.219	2.67251	231.844	124.265	37.1732	2.74784	37.1732	2.74784	934.205	64.2399	0.813367	0.0638785	0.08	9.85444e-16	0.313177	0.0253587	59.9357	24.3493	6.37467	1.66298	287.334	493.48	4.98937	4.27883	5.46187	0.216158	1	0
ET01		This study	32.1186	104.794	5545.39	2459.7	957.758	800.332	228.552	0.600953	0.26971	148.298	0.467105	174.115	206.443	8.29122	5.77978	8.29122	5.77978	590.971	221.941	0.828945	0.147596	0.289951	0.269966	1.94878	0.334519	37.3899	29.405	29.5236	14.9703	348.148	279.11	15.5983	6.37885	25.1041	2.10617	0	1
ET02		This study	32.3733	104.63	4447.86	2711.97	878.811	839.988	226.136	0.622969	0.274325	171.177	0.524855	189.592	218.728	8.65896	6.06796	8.65896	6.06796	530.719	192.991	0.818455	0.161107	0.172154	0.0713842	2.80996	0.468017	38.8622	29.9425	47.9568	23.8133	364.048	293.321	25.3892	10.4193	38.9526	3.17095	0	1
ET03		This study	32.2873	104.794	5071.65	2564.45	928.186	814.516	229.234	0.609725	0.271106	157.946	0.490605	179.984	210.704	8.52436	5.89092	8.52436	5.89092	560.026	201.537	0.826297	0.152984	0.228333	0.180776	2.63381	0.257813	37.9594	29.4445	42.0949	20.7317	352.803	283.965	22.3046	9.02059	35.0397	1.67638	0	1
ET04		This study	31.891	104.783	5798.42	2402.6	977.311	794.389	230.39	0.596417	0.27119	137.031	0.452465	171.299	206.381	8.14723	5.72439	8.14723	5.72439	611.653	238.408	0.829004	0.146914	0.305882	0.277383	2.79499	0.291322	37.1058	29.7683	39.3148	20.0352	353.467	277.755	20.516	8.11169	34.5794	1.76157	0	1
ET05		This study	32.4729	104.532	1493.22	2814.01	679.793	820.649	183.521	0.633981	0.254126	189.714	0.729494	181.833	220.626	12.9614	6.07129	12.9614	6.07129	493.151	141.645	0.831148	0.137753	0.170739	0.0605124	1.4232	0.228304	37.6806	30.4277	27.4484	14.2352	394.991	282.732	13.6835	5.00659	20.7937	1.63031	0	1
ET06		This study	32.4699	104.52	2787.03	2739.05	926.979	862.522	240.59	0.624665	0.284433	183.151	0.778877	199.291	220.483	6.73378	4.77499	6.73378	4.77499	531.714	202.594	0.80936	0.174393	0.160418	0.0578808	3.39611	0.444677	40.0182	29.7257	60.8803	28.9257	348.487	303.878	33.5551	14.7581	48.7338	3.11878	0	1
ET08		This study	32.5133	104.153	644.493	3230.98	761.918	1011.69	222.211	0.692806	0.330045	251.023	1.06334	257.87	272.18	7.54054	4.50277	7.54054	4.50277	365.536	150.637	0.776169	0.190611	0.129763	0.0110789	1.78071	0.173455	43.0351	32.5704	41.7936	20.0893	391.843	341.07	22.7444	9.93632	30.0216	1.42928	0	0
ET09		This study	32.5307	104.151	885.354	3348.12	735.602	911.603	224.597	0.655915	0.295793	233.28	0.849471	225.199	249.135	4.89225	3.81803	4.89225	3.81803	428.35	182.094	0.719757	0.219383	0.114028	0.0152245	3.24075	0.355135	41.3806	30.7263	72.4518	34.2555	394.001	317.384	38.3618	15.5556	52.6271	2.8187	0	0
ET10		This study	32.752	103.962	358.7	3779.65	439.247	785.904	178.221	0.588006	0.279291	176.973	1.20989	176.186	135.829	5.83646	4.511	5.83646	4.511	284.102	97.7167	0.652222	0.228196	0.100978	0.00473983	3.01175	0.435581	32.0453	19.0842	60.0064	23.1643	175.347	205.835	40.5023	23.894	42.4669	3.00186	0	0
ET11		This study	33.2907	104.181	4182.14	3358.23	546.497	779.27	201.17	0.582293	0.232968	168.678	0.526672	181.801	165.232	9.52272	6.33046	9.52272	6.33046	609.268	144.495	0.792036	0.13872	0.0715784	0.0180251	1.80818	0.172018	41.454	27.9837	29.1973	12.5384	321.751	311.608	17.1222	8.31102	24.8779	1.15674	0	0
ET12		This study	32.9843	103.696	64.9377	4054.26	319.923	604.133	156.007	0.518051	0.262189	81.007	0.81819	97.9598	84.7228	16.4226	3.68901	16.4226	3.68901	342.217	116.263	0.496659	0.237556	0.0859199	0.00913035	2.91333	0.726459	20.6899	15.028	35.0004	16.9303	103.394	113.896	23.3394	13.148	27.5493	3.35757	0	0
wbo302		Ouimet et al. 2009	30.27	101.53	36.1665	4071.45	101.919	155.486	56.2986	0.108809	0.0651946	108.462	4.09678	75.765	175.957	20.694	1.65226	20.694	1.65226	576.868	36.9802	0.700591	0.0445162	0.06	1.92923e-15	0.283971	0.0245073	19.9952	25.5641	4.66719	3.76574	128.098	319.149	2.73726	3.4033	3.11744	0.131496	1	0
wbo305		Ouimet et al. 2009	29.89	101.54	21.1005	4296.58	33.3947	129.68	88.3469	0.0742206	0.0534473	50.0525	3.67587	32.9436	101.789	23.0585	1.41305	23.0585	1.41305	714.182	63.1844	0.724502	0.0488255	0.04	1.9502e-15	0.415564	0.0455133	10.7546	19.3018	4.65831	5.27194	63.0366	200.127	2.6329	4.17073	3.07227	0.164457	1	0
wbo316		Ouimet et al. 2009	29.43	101.23	33.3477	4476.49	391.331	725.887	226.96	0.511743	0.261209	284.858	9.69467	241.052	239.592	32.1087	1.07644	32.1087	1.07644	589.318	121.226	0.296603	0.216196	0.0296235	0.00999412	0.575726	0.053562	47.018	37.8203	14.5021	7.39072	401.45	421.029	8.24448	4.32755	10.3545	0.470829	1	0
wbo439		Ouimet et al. 2009	29.41	101.23	94.9239	4481.21	482.977	759.567	190.573	0.520415	0.250582	288.811	5.4162	232.282	234.622	24.7074	3.18198	24.7074	3.18198	301.479	53.5557	0.441114	0.268131	0.0200137	0.000522396	0.858694	0.0765035	39.2514	26.7736	24.5715	10.6436	286.224	315.895	14.759	8.15013	15.553	0.677249	1	0
wbo505		Ouimet et al. 2009	32.21	101.61	18.8568	3755.24	377.533	733.509	143.749	0.571024	0.190832	242.901	3.79236	213.066	153.92	42.1871	0.86044	42.1871	0.86044	744.177	85.2546	0.812458	0.0512451	0.04	1.4436e-15	0.547547	0.0513544	49.8973	26.7263	11.3287	3.87894	390.269	306.701	6.78094	2.6764	9.07736	0.416109	1	0
wbo506		Ouimet et al. 2009	31.89	100.75	40.6944	4233.25	317.616	633.609	123.926	0.50176	0.187906	153.08	2.0646	141.452	88.3993	50.2569	3.25915	50.2569	3.25915	422.922	29.7222	0.682473	0.139832	0.020203	0.00200502	0.770838	0.0615068	32.3634	15.615	13.2023	4.06561	200.79	132.768	8.38077	2.78361	10.0923	0.393589	1	0
wbo508		Ouimet et al. 2009	32.2	101.02	86.022	4053.55	204.203	441.517	174.141	0.36545	0.19629	131.643	3.10884	109.543	99.438	89.1281	2.02737	89.1281	2.02737	464.047	73.3972	0.75962	0.0519062	0.0389266	0.00450761	0.264352	0.0214391	26.8326	18.1513	4.38146	1.87929	162.124	161.651	2.7499	1.37177	3.20415	0.127007	1	0
wbo510		Ouimet et al. 2009	31.72	100.93	172.911	4056.4	194.502	322.62	103.383	0.291776	0.157824	46.9792	0.467688	53.8019	45.6775	34.9508	4.38533	34.9508	4.38533	511.014	61.614	0.800436	0.0411951	0.04	9.21507e-15	0.700311	0.0581049	17.1117	11.4752	5.49926	2.34054	83.489	71.6309	3.61989	1.55626	5.01237	0.203262	1	0
wbo511		Ouimet et al. 2009	31.77	100.99	8.8857	4228.02	284.868	636.308	144.488	0.484665	0.189164	194.979	2.41793	188.757	88.4511	50.5312	0.904087	50.5312	0.904087	422.844	7.53204	0.727179	0.0825341	0.04	6.94206e-16	0.367219	0.0289785	40.1657	13.0779	6.99186	1.47457	264.525	125.363	4.43197	1.06173	5.44088	0.209851	1	0
wbo512		Ouimet et al. 2009	31.79	101.1	10.6029	4025.43	292.695	641.493	154.222	0.515892	0.20582	203.316	4.03714	187.184	94.7336	55.5619	1.28061	55.5619	1.28061	400.464	22.1465	0.788276	0.0324154	0.04	7.14979e-16	0.399871	0.0324164	38.0794	14.1837	8.21037	1.96886	247.359	131.668	5.20365	1.39658	6.05285	0.239826	1	0
wbo513		Ouimet et al. 2009	31.77	101.37	23.8302	4135.63	400.237	801.982	255.724	0.581093	0.244887	309.255	7.01844	282.311	185.407	62.9582	1.57902	62.9582	1.57902	610.768	37.3775	0.670472	0.15985	0.04	2.44291e-15	0.365394	0.0311635	57.9229	27.5809	8.76198	2.66706	478.174	334.814	5.20609	1.83074	6.85366	0.285692	1	0
wbo518		Ouimet et al. 2009	30.95	101.72	21.1977	3648.53	443.467	932.346	127.996	0.688621	0.21431	268.336	4.09407	243.218	149.451	33.3829	1.71885	33.3829	1.71885	401.545	85.5259	0.82502	0.052372	0.06	1.68647e-15	0.644714	0.0556582	44.1302	21.0153	15.9211	4.85146	319.065	210.926	9.75262	3.24229	11.2465	0.474536	1	0
wbo521		Ouimet et al. 2009	30.54	101.62	27.8235	4186.99	315.204	629.817	161.81	0.439958	0.18983	133.173	3.75394	131.898	71.8938	0.826592	0.55237	0.826592	0.55237	591.121	88.6439	0.671095	0.199654	0.06	1.83213e-15	1.53935	0.151281	35.0206	14.1213	21.824	5.69254	220.137	126.56	13.9068	4.04113	18.7687	0.901513	1	0
wbo522		Ouimet et al. 2009	30.68	101.75	14.2317	3926.54	489.295	1040.84	157.448	0.721112	0.268753	285.331	5.0337	288.605	219.302	16.6792	1.1564	16.6792	1.1564	656.869	13.9034	0.721583	0.204942	0.06	1.409e-15	1.07244	0.1089	57.5574	34.3904	23.8219	9.09088	499.012	389.905	13.8011	5.42267	19.3044	0.958082	1	0
wbo536		Ouimet et al. 2009	30.04	100.98	78.9669	3800.87	395.848	720.631	99.1607	0.568761	0.179273	197.584	0.939383	180.399	105.319	45.6208	3.23719	45.6208	3.23719	913.265	236.71	0.720633	0.183047	0.0373392	0.00679269	0.377054	0.0323902	48.1746	22.0108	6.48776	1.89988	361.563	232.878	3.94589	1.27888	5.62464	0.236155	1	0
wbo538		Ouimet et al. 2009	30.04	101.22	43.8048	4048.66	354.727	678.505	155.23	0.528769	0.192309	188.746	2.71833	167.929	76.7081	50.8834	2.13852	50.8834	2.13852	479.387	145.694	0.726672	0.149057	0.04	1.62385e-15	0.377757	0.0307376	37.8255	12.6272	7.2309	1.56373	242.81	113.017	4.60604	1.08508	5.50481	0.218923	1	0
wbo544		Ouimet et al. 2009	29.98	101.58	62.5806	3961.25	268.064	452.243	60.7758	0.417889	0.200529	86.4052	1.85504	73.1433	44.5949	15.6128	2.33739	15.6128	2.33739	620.005	94.2366	0.710886	0.0582985	0.0401941	0.00196107	0.432844	0.0357187	23.4244	11.3045	5.12948	1.58048	124.086	77.9466	3.377	1.06658	4.23036	0.170621	1	0
wbo545		Ouimet et al. 2009	30.33	101.52	16.6293	3917.24	98.6436	283.134	34.9818	0.297569	0.138473	25.7497	0.789334	27.312	29.0565	22.0089	1.55032	22.0089	1.55032	544.779	25.2468	0.771669	0.0289337	0.0604676	0.00302291	0.765059	0.0667787	10.1726	9.11676	4.56934	2.59033	42.5776	45.2309	3.03275	1.61174	4.02665	0.171782	1	0
wbo609		Ouimet et al. 2009	32.42	100.81	41.877	4192.53	245.794	544.508	97.5943	0.461966	0.184043	125.022	1.60763	128.794	78.7634	88.9276	1.74501	88.9276	1.74501	560.687	24.3921	0.714614	0.0512506	0.02	6.66198e-16	0.95183	0.0754658	33.2911	15.1511	13.0793	3.80467	207.714	132.159	8.31007	2.65717	11.2365	0.435427	1	0
wbo610		Ouimet et al. 2009	32.53	100.67	46.9314	4139.49	201.106	492.485	62.8538	0.452099	0.166061	83.1524	0.419255	87.9398	62.0129	101.578	2.48525	101.578	2.48525	700.734	76.8044	0.739096	0.0645167	0.02	1.02011e-15	0.982533	0.133582	27.3324	15.5905	10.1675	3.75552	161.834	117.389	6.46171	2.37858	9.41614	0.625697	1	0
wbo612		Ouimet et al. 2009	32.22	100.39	38.3778	4238.1	174.324	368.945	70.2267	0.3143	0.120796	56.9559	0.627482	58.9366	41.3982	61.2667	3.79137	61.2667	3.79137	426.279	47.1457	0.787512	0.0439665	0.02	3.60861e-16	0.833978	0.0715246	18.1856	9.90337	7.641	2.65296	86.6966	62.4804	5.12892	1.8565	6.58665	0.276094	1	0
wbo613		Ouimet et al. 2009	32.61	101.19	36.1989	4148.03	319.619	651.361	177.131	0.518407	0.205261	185.087	3.83825	167.496	123.1	97.5693	1.13603	97.5693	1.13603	633.155	52.9878	0.729654	0.0868475	0.0262341	0.00926482	0.452221	0.038127	40.6487	23.1636	8.11213	2.94177	291.77	230.878	4.93371	1.95768	6.5243	0.268848	1	0
wbo614		Ouimet et al. 2009	32.58	101.08	15.5844	3956.24	251.427	595.2	66.6074	0.467066	0.143524	184.623	3.03704	164.634	81.1371	109.369	1.16816	109.369	1.16816	527.968	47.5572	0.759891	0.0613943	0.02	2.15162e-16	0.510229	0.0425428	39.7616	13.7022	9.25757	2.0654	261.74	136.048	5.86175	1.53842	7.35176	0.299601	1	0
wbo616		Ouimet et al. 2009	32.43	101.05	76.0752	3821.41	193.884	398.044	69.2265	0.379943	0.164874	72.8173	0.657327	76.5063	54.6163	103.595	1.95807	103.595	1.95807	443.046	74.5114	0.777268	0.0421769	0.0246103	0.0084237	1.64796	0.140864	21.5481	12.1976	17.347	6.25496	112.977	82.8732	11.3542	4.18215	14.7572	0.616524	1	0
wbo617		Ouimet et al. 2009	32.34	101.22	29.4435	3935.17	177.349	402.406	54.4338	0.391593	0.155626	72.1991	0.850268	75.0356	56.9152	82.4244	1.12107	82.4244	1.12107	427.415	34.9141	0.792362	0.0312712	0.0375901	0.00651169	0.781173	0.0631399	20.3626	11.6833	8.44895	3.08323	103.779	81.0538	5.5674	2.18024	6.96485	0.275144	1	0
wbo618		Ouimet et al. 2009	31.45	100.72	44.1207	3969.48	292.82	633.639	93.0152	0.501059	0.169552	146.509	1.74937	150.481	84.3265	7.88782	1.76031	7.88782	1.76031	742.602	61.6036	0.772552	0.0446695	0.02	8.32744e-16	0.556279	0.0465486	40.4502	17.7419	7.92331	2.22785	277.418	161.14	4.92643	1.44176	7.12163	0.291262	1	0
wbo619		Ouimet et al. 2009	31.03	101.07	57.6315	3983.72	395.19	596.623	96.363	0.476071	0.186145	172.262	1.08114	160.895	78.8975	5.1498	2.9034	5.1498	2.9034	779.897	57.1723	0.75729	0.0792787	0.04	2.84515e-16	0.905597	0.0756801	43.7778	15.7604	14.4293	3.35882	303.922	161.535	9.01018	2.41789	12.5943	0.514415	1	0
wbo621		Ouimet et al. 2009	30.32	101.38	64.1277	4276.14	98.5684	180.814	46.6149	0.127526	0.0888302	59.7698	1.3217	47.8904	35.3921	36.2401	2.83221	36.2401	2.83221	505.084	85.8007	0.68105	0.116169	0.06	2.0818e-15	0.665888	0.0566568	16.5801	9.28202	6.78619	2.41882	75.7718	57.7504	4.59613	1.7574	5.39036	0.224161	1	0
wbo622		Ouimet et al. 2009	30.31	101.42	3.2076	4249.24	66.0559	209.838	42.4984	0.172588	0.0866123	64.8685	3.45032	57.0729	37.4282	30.3621	0.49735	30.3621	0.49735	519.155	15.2109	0.734321	0.018336	0.06	3.05698e-16	0.849411	0.0803478	18.673	8.34595	8.71711	2.4916	86.3711	57.0668	5.96072	1.97815	7.16985	0.33148	1	0
wbo623		Ouimet et al. 2009	30.14	101.51	12.3444	3804.51	153.393	476.301	72.4686	0.426496	0.159063	45.6009	1.73132	56.4541	37.6405	30.7255	1.16889	30.7255	1.16889	743.128	4.83275	0.785582	0.0517472	0.06	1.27718e-15	0.807002	0.0703937	20.0448	11.1408	5.56768	1.96868	101.307	67.129	3.67657	1.22367	5.68873	0.242531	1	0
wbo624		Ouimet et al. 2009	29.77	101.1	53.6787	3826.66	414.58	756.428	131.284	0.557593	0.183922	235.311	4.14421	196.793	156.07	44.2262	2.37548	44.2262	2.37548	691.319	152.244	0.734309	0.12681	0.0395141	0.00307947	0.399046	0.0649764	46.0235	26.4022	8.41591	3.16004	349.08	309.404	5.06134	2.27465	6.50897	0.518009	1	0
wbo625		Ouimet et al. 2009	30.05	101.31	4.941	4290.75	170.588	539.187	121.404	0.416693	0.159979	149.514	6.52931	134.565	57.1819	43.687	0.719917	43.687	0.719917	373.484	3.91832	0.713259	0.0850368	0.04	5.62512e-16	0.598604	0.0562096	30.1038	9.08877	10.4807	2.06746	170.566	75.7937	6.89547	1.55488	7.74346	0.355384	1	0
wbo626		Ouimet et al. 2009	30.06	101.36	4.4955	4356.12	44.2678	267.398	78.5943	0.176911	0.10409	14.7756	0.340022	13.9627	13.7267	41.0064	0.442956	41.0064	0.442956	409.333	4.57012	0.490092	0.153153	0.0411892	0.00473392	2.80868	0.229906	5.99355	5.03617	13.4326	7.141	18.7071	18.2926	9.6289	4.71157	11.1282	0.445211	1	0
wbo638		Ouimet et al. 2009	28.38	101.88	24.8832	2918.71	574.504	1137.72	193.795	0.742006	0.226389	348.548	5.27403	351.991	231.471	2.9033	1.45594	2.9033	1.45594	1033.47	66.7411	0.830141	0.077223	0.02	1.30472e-15	0.737346	0.0643801	77.9199	39.8089	16.5319	5.39529	759.5	529.343	9.40021	3.29269	14.7024	0.627424	1	0
wbo641		Ouimet et al. 2009	28.61	101.68	32.9913	3518.93	622.34	885.562	127.854	0.622314	0.244361	335.35	4.30031	296.566	180.789	17.7951	1.27774	17.7951	1.27774	745.687	156.239	0.610232	0.240771	0.02	2.29012e-16	0.605338	0.0536435	66.8625	30.201	14.3799	4.16793	590.579	366.345	8.41771	2.63042	11.8344	0.512573	1	0
wbo642		Ouimet et al. 2009	28.93	101.54	63.7227	4061.93	397.647	690.644	162.698	0.516082	0.202524	235.53	3.72857	210.791	140.579	7.19661	2.6706	7.19661	2.6706	418.27	104.023	0.550024	0.247468	0.0201805	0.00189153	1.07417	0.0911846	42.7525	20.6082	23.7534	7.31984	304.284	209.139	14.604	5.0434	17.5295	0.727293	1	0
wbo643		Ouimet et al. 2009	29.51	101.43	26.973	4370	358.771	785.904	211.239	0.548521	0.194947	228.159	4.05779	216.416	111.935	18.5822	1.35331	18.5822	1.35331	319.294	14.0924	0.320218	0.187045	0.04	2.33182e-15	0.661819	0.0560365	40.0487	15.8033	14.7725	3.75198	269.151	143.209	9.26628	2.48883	10.6261	0.439743	1	0
wbo644		Ouimet et al. 2009	29.72	101.52	20.6874	4270.73	261.854	577.806	162.57	0.437146	0.195843	183.115	5.30046	153.894	93.174	17.1568	1.44792	17.1568	1.44792	471.122	31.8722	0.683993	0.107132	0.04	1.86693e-15	0.247385	0.0212828	35.7564	15.8408	4.75982	1.35036	229.735	143.336	3.00834	0.944082	3.5496	0.149254	1	0
wbo645		Ouimet et al. 2009	29.93	101.39	47.5956	4154.16	205.389	370.949	122.272	0.280717	0.176926	105.134	1.92643	104.446	65.0713	36.9647	1.82466	36.9647	1.82466	451.396	71.8139	0.560185	0.17252	0.04	2.12348e-15	0.231135	0.0185619	26.8718	12.5475	3.05665	0.911604	151.514	93.567	1.98612	0.616668	2.49729	0.0980207	1	0
wbo653		Ouimet et al. 2009	31.03	101.87	62.3133	3760.24	613.126	920.953	197.719	0.627339	0.244291	342.094	3.29149	291.51	235.065	47.8157	2.41568	47.8157	2.41568	607.763	115.223	0.730368	0.185583	0.0695203	0.0102003	0.681099	0.0611541	57.805	33.4789	18.0899	6.67784	493.775	430.936	10.5641	4.62275	13.4517	0.590317	1	0

## Sheet: Table S4
Table S4. RMSE (mm yr-1) from relationships between erosion rates and topographic metrics
		Modelsa
Relationships	Basin group	Linear model without intercept	Linear model with intercept	Exponential model	Power-law model
E vs. ksn	All basins	0.130827	0.125147	0.127352	0.123073
E vs. erosion index (sp)	All basins	0.130275	0.122841	0.125393	0.121398
E vs. erosion index (ss)	All basins	0.127221	0.126046	0.128254	0.124837
E vs. slope	All basins	0.109966	0.108048	0.111478	0.108161
E vs. local relief	All basins	0.107413	0.106878	0.111042	0.107169
E vs. ksn	Basins with A < 200 km2	0.0841228	0.0787358	0.0799152	0.0783661
E vs. erosion index (sp)	Basins with A < 200 km2	0.101577	0.087544	0.0882859	0.08631
E vs. erosion indes (ss)	Basins with A < 200 km2	0.0786115	0.0780583	0.0793721	0.0778187
E vs. slope	Basins with A < 200 km2	0.0685319	0.0674654	0.0693838	0.0672045
E vs. local relief	Basins with A < 200 km2	0.0663671	0.0664173	0.0687538	0.066427
a Model used to infer rate constants examined in Table S7 are shown in bold.

## Sheet: Table S5
Table S5. Percentages of different rock types within studied basins
Sample	Metamorphic rocks	Plutonic rocks	Carbonate rocks	Mixed composition sedimentary rocks	Siliciclastic sedimentary rocks	Unconsolidated sedimentary rocks	Volcanic and pyroclastic rocks	Total
LM253 and SC082	0.0805934	0.0583975	0.267953	0.403756	0.172509	0	0.0167917	1
LM259	0.000510758	0.196384	0.00475654	0.315357	0.482891	0	0.0001018	1
SC004	0	0.0279606	0.531654	0.0888773	0.346678	0	0.00482977	1
SC016	0	0.437143	0.0122827	0	0	0	0.550574	1
SC031	0	0.506354	0.0276843	0.312485	0.0112459	0	0.142231	1
SC033	0	0	0.113342	0	0.886658	0	0	1
SC059	0.584639	0.177116	0	0	0	0	0.238245	1
SC071	0	0.209193	0.120375	0.561505	0.0651956	0	0.0437315	1
SP20	0	0	0	0.73633	0.26367	0	0	1
SP19	0	0	0	0.000358938	0.999641	0	0	1
SP18	0	0	0	0	1	0	0	1
SP17	0	0	0	0.532882	0.195973	0.271144	0	1
SP16	0	0	0	0.468251	0.355779	0.17597	0	1
SP15	0	0	0	0	0.915541	0.0844595	0	1
SP14	0	0	0	0	0.812103	0.187897	0	1
SP13	0	0	0	0.645447	0.354553	0	0	1
SP12	0	0	0	0	1	0	0	1
SP11	0	0	0	0.379731	0.620269	0	0	1
SP10	0	0	0	0.0756076	0.924392	0	0	1
SP09	0	0	0	0.620174	0.379826	0	0	1
SP08	0	0	0.214679	0.0896789	0.695183	0.000458716	0	1
SP07	0	0	0.0177751	0	0.940546	0.0416794	0	1
SP06	0	0	0.00625667	0.140348	0.853395	0	0	1
SP05	0	0	0	0.131013	0.868987	0	0	1
SP04	0	0	0	0	1	0	0	1
SP03	0	0	0	0	1	0	0	1
SP02	0	0	0	0	1	0	0	1
SP01	0	0	0	0.730098	0.223712	0	0.0461899	1
Ma02	0	0	0	0	1	0	0	1
Ma03	0	0	0	0	1	0	0	1
Ma04	0	0	0	0.107124	0.892876	0	0	1
Ma05	0	0	0	0	1	0	0	1
Ma06	0	0	0	0	1	0	0	1
Ma07	0	0.00780686	0	0.0351137	0.957079	0	0	1
Ma09	0	0.16958	0	0.102272	0.728148	0	0	1
HS01	0	0	0	0.738437	0.000374018	0	0.261189	1
HS03	0	0	0	0	1	0	0	1
HS04	0	0	0	0	1	0	0	1
HS05	0	0	0	0	1	0	0	1
HS06	0	0.0205634	0	0.771831	0.207606	0	0	1
HS07	0	0	0	0	1	0	0	1
wbo424	0.227945	0.772055	0	0	0	0	0	1
wbo444	0	1	0	0	0	0	0	1
wbo445	0	1	0	0	0	0	0	1
wbo448	0.686481	0.313519	0	0	0	0	0	1
wbo450	0.464937	0.535063	0	0	0	0	0	1
wbo501	0	0.267475	0	0.732525	0	0	0	1
wbo502	0	0	0	0	1	0	0	1
wbo514	0	0.0169199	0	0	0.98308	0	0	1
wbo515	0	0	0	0.198968	0.801032	0	0	1
wbo519	0	0	0	0	1	0	0	1
wbo524	0.440947	0.320083	0.0130974	0.225873	0	0	0	1
wbo529	0	1	0	0	0	0	0	1
wbo530	0.107881	0.892119	0	0	0	0	0	1
wbo551	0.137328	0.17294	0.135409	0.09372	0	0	0.460603	1
wbo604	0	0.23327	0	0.560211	0.0771257	0	0.129393	1
wbo605	0	0	0	0	1	0	0	1
wbo607	0	0	0	0	1	0	0	1
wbo647	0	0.56659	0	0	0	0	0.43341	1
wbo651	0	0	0	0.115385	0.884615	0	0	1
ET01	0.0492144	0.0349422	0.0290454	0.629765	0.194986	0	0.0620464	1
ET02	0.0557511	0.0298952	0.0315269	0.56237	0.2431	0	0.0773566	1
ET03	0.052481	0.0341191	0.030064	0.602294	0.2132	0	0.067842	1
ET04	0.0470668	0.0334174	0.0456126	0.62701	0.186478	0.00107703	0.0593388	1
ET05	0.0631357	0.0792139	0.0385519	0.390314	0.428785	0	0	1
ET06	0.0551472	0.00217683	0.0294613	0.631526	0.158234	0	0.123454	1
ET08	0.00547959	0.00941333	0	0.552571	0.180776	0	0.25176	1
ET09	0.00482142	0	0.062221	0.578396	0.213405	0	0.141157	1
ET10	0	0	0.130767	0.494524	0.33727	0	0.0374393	1
ET11	0	0.00013945	0.0661941	0.175025	0.752384	0.00625781	0	1
ET12	0	0	0.236343	0.608007	0.00498878	0.150661	0	1
wbo302	0	1	0	0	0	0	0	1
wbo305	0	0.8078	0.0031	0.0031	0.1842	0.0004	0.0015	1.0001
wbo316	0.0002	0.6775	0.0017	0.0015	0.3176	0.0005	0.001	1
wbo439	0	0.6284	0.001	0.0012	0.3682	0	0.0012	1
wbo505	0	0	0	0	1	0	0	1
wbo506	0	0	0	0.0486	0.9514	0	0	1
wbo508	0	0	0	0.8595	0.1405	0	0	1
wbo510	0	0	0	0.0952	0.9048	0	0	1
wbo511	0	0	0	0	1	0	0	1
wbo512	0	0	0	0	1	0	0	1
wbo513	0	0.1665	0.0014	0.2735	0.5562	0.0007	0.0017	1
wbo518	0	0	0.0019	0.9981	0	0	0	1
wbo521	0	0.0346	0.0009	0.9633	0	0	0.0012	1
wbo522	0	0	0.7506	0.1321	0.0046	0.0017	0.1111	1.0001
wbo536	0	0	0	0	1	0	0	1
wbo538	0	0.0026	0	0.0004	0.997	0	0	1
wbo544	0	0	0	0	1	0	0	1
wbo545	0	0	0	0	1	0	0	1
wbo609	0	0	0	0.6444	0.3556	0	0	1
wbo610	0	0	0	0	1	0	0	1
wbo612	0	0	0	0.4963	0.5037	0	0	1
wbo613	0	0	0	0.8253	0.1747	0	0	1
wbo614	0	0	0	0.5636	0.4364	0	0	1
wbo616	0	0	0	0	1	0	0	1
wbo617	0	0	0	0	1	0	0	1
wbo618	0	0	0	0.9782	0.0218	0	0	1
wbo619	0	0	0.0176	0.6996	0.2829	0	0	1.0001
wbo621	0	0.0128	0.0003	0.0004	0.9866	0	0	1.0001
wbo622	0	0	0	0	1	0	0	1
wbo623	0	0	0	0	1	0	0	1
wbo624	0	0	0	0	1	0	0	1
wbo625	0	0	0	0	1	0	0	1
wbo626	0	0	0	0	1	0	0	1
wbo638	0	0.2948	0.357	0.22	0	0	0.1282	1
wbo641	0.3578	0.0007	0.518	0.1212	0.0002	0	0.002	0.9999
wbo642	0	0	0	0.1816	0.8184	0	0	1
wbo643	0	0	0	0	1	0	0	1
wbo644	0	0	0	0	1	0	0	1
wbo645	0.0002	0.2768	0.0027	0.002	0.7157	0	0.0026	1
wbo653	0.8099	0.0034	0.1826	0	0	0	0.0042	1.0001

## Sheet: Table S6
Table S6. Number of basins dominated by each lithologic type
	Number of basinsa
Lithology	Basins with > 50% composed of a single lithology	Basins with > 50% composed of a single lithology & A < 200 km2	Basins with 100% composed of a single lithology	Basins with 100% composed of a single lithology & A < 200 km2
Metamorphic rocks	3	3	0	0
Plutonic rocks	12	11	4	4
Carbonate rocks	3	2	0	0
Mixed composition sedimentary rocks	26	18	0	0
Siliciclastic sedimentary rocks	58	56	33	33
Unconsolidated sedimentary rocks	0	0	0	0
Volcanic and pyroclastic rocks	1	1	0	0
a Lithologic groups used in Table S7 shown in bold.

## Sheet: Table S7
Table S7. Correlation between erosion coefficients and potential controls
			K					Knl					Kss					Ksp					Kslp					Klr
	Basin goups	Number	Distance to faults	Distance to active faults	Precipitation	NDVI	PGA	Distance to faults	Distance to active faults	Precipitation	NDVI	PGA	Distance to faults	Distance to active faults	Precipitation	NDVI	PGA	Distance to faults	Distance to active faults	Precipitation	NDVI	PGA	Distance to faults	Distance to active faults	Precipitation	NDVI	PGA	Distance to faults	Distance to active faults	Precipitation	NDVI	PGA
R valuea	All basins	111	-0.38666	-0.395042	-0.189375	0.0993909	0.0760441	-0.411548	-0.408796	-0.112359	0.0499652	0.192073	-0.387565	-0.382687	-0.199468	-0.0155863	0.188398	-0.412064	-0.411803	-0.18018	0.0260537	0.157599	-0.378488	-0.384678	-0.161523	-0.036419	0.0515489	-0.385319	-0.390621	-0.194855	0.0322779	0.0759085
	Basins with A < 200 km2	95	-0.352665	-0.362541	-0.133871	0.0805649	0.0243772	-0.418809	-0.417575	0.0221594	0.0283492	0.136833	-0.391866	-0.38818	-0.10107	-0.0564511	0.11534	-0.404358	-0.404872	-0.0777191	0.0358234	0.168404	-0.368208	-0.375797	-0.05827	-0.0843945	-0.0101641	-0.3772	-0.384684	-0.106849	0.0166884	0.00818164
	Basins with A < 200 km2, dominated by siliciclastic sedimentary rocks	56	-0.413064	-0.413152	-0.223813	0.0494523	0.097986	-0.466643	-0.466494	-0.246741	0.120376	0.224049	-0.459522	-0.459725	-0.318606	0.0819123	0.207528	-0.494727	-0.49548	-0.320723	0.128773	0.181393	-0.426404	-0.426258	-0.282361	-0.0223253	0.168969	-0.433145	-0.433266	-0.278217	0.107413	0.15197
	Basins with A < 200 km2, dominated by mixed composition sedimentary rocks	18	-0.528686	-0.547546	-0.120315	-0.384022	0.010571	-0.419441	-0.432263	-0.27073	-0.190088	0.201449	-0.361357	-0.371367	-0.363249	-0.134928	0.256618	-0.305767	-0.315284	-0.333207	-0.0864793	0.17509	-0.461485	-0.484745	-0.036779	-0.248319	-0.0616222	-0.466022	-0.488563	-0.0546192	-0.248044	-0.000573467
	Basins with A < 200 km2, dominated by plutonic rocks	11	-0.478262	-0.544348	0.691065	0.358643	0.0110649	-0.577612	-0.590173	0.51844	0.192886	0.0302537	-0.51099	-0.470639	0.209425	-0.0645032	0.0175485	-0.594706	-0.582718	0.378542	0.165746	0.0974053	0.38963	0.327007	0.204263	0.177168	-0.313095	-0.0474829	-0.104081	0.471477	0.14787	-0.234665
p-valuea	All basins	111	2.76694e-05	1.78053e-05	0.0465193	0.299332	0.427629	7.2115e-06	8.4122e-06	0.240357	0.602518	0.0434297	2.63982e-05	3.39595e-05	0.0358279	0.87102	0.0476816	7.00506e-06	7.10868e-06	0.0584446	0.786059	0.098545	4.20465e-05	3.0657e-05	0.0903371	0.704331	0.591053	2.96591e-05	2.24994e-05	0.0404254	0.736639	0.428456
	Basins with A < 200 km2	95	0.000456301	0.00030563	0.195884	0.43768	0.814605	2.40135e-05	2.55185e-05	0.83121	0.785075	0.186084	8.59588e-05	0.00010149	0.329774	0.586877	0.265694	4.82385e-05	4.70833e-05	0.454088	0.730356	0.102818	0.00024142	0.000174831	0.574863	0.416138	0.922124	0.000164558	0.000118596	0.302725	0.872474	0.937279
	Basins with A < 200 km2, dominated by siliciclastic sedimentary rocks	56	0.00155642	0.00155244	0.097277	0.717395	0.472478	0.000288737	0.000290211	0.0667645	0.37685	0.0969155	0.000367084	0.000364617	0.0167028	0.5484	0.12485	0.000106259	0.000103327	0.0159532	0.34422	0.180917	0.0010495	0.0010541	0.0349917	0.870267	0.213167	0.000854692	0.000851509	0.0378745	0.430721	0.263524
	Basins with A < 200 km2, dominated by mixed composition sedimentary rocks	18	0.0240871	0.0186682	0.634402	0.115643	0.966794	0.0831425	0.0732126	0.277211	0.449945	0.422791	0.140652	0.129182	0.138431	0.593476	0.303986	0.217223	0.202517	0.176638	0.732953	0.487111	0.053882	0.0414675	0.884801	0.320431	0.808081	0.0512644	0.0396587	0.82957	0.320984	0.998198
	Basins with A < 200 km2, dominated by plutonic rocks	11	0.136744	0.0834017	0.0185276	0.278766	0.974242	0.0627549	0.0559578	0.102291	0.569876	0.929638	0.108197	0.144014	0.536556	0.85055	0.959158	0.0536334	0.059928	0.250977	0.626224	0.775713	0.23621	0.326311	0.546869	0.602269	0.3485	0.88974	0.760715	0.143203	0.664367	0.48733
a Correlation coefficient (R value) based on linear model. Statistically signicant correlation with p-value < 0.05 shown in bold.

## Sheet: Table S8
Table S8. Ranges of erosion coefficients for categories of basins grouped based on drainage area, dominant lithologies, and the distance to major faults
Distance	Lithology	Number of basins	Minimum	25th percentile	Median	75th percentile	Maximum	Mean	std
All	All basins	111	0.231135	0.601338	0.885743	1.77231	4.00771	1.22482	0.836698
	Basins with A < 200 km2	95	0.231135	0.559224	0.803831	1.4275	4.00771	1.07663	0.751044
	Basins with A < 200 km2, dominated by siliciclastic sedimentary rocks	56	0.231135	0.557802	0.792502	1.54955	4.00771	1.11981	0.823614
	Basins with A < 200 km2, dominated by mixed composition sedimentary rocks	18	0.264352	0.529024	0.928713	1.87292	2.91333	1.20033	0.800415
	Basins with A < 200 km2, dominated by plutonic rocks	11	0.283971	0.530619	0.734779	0.885271	2.07037	0.84713	0.511248
Within 15 km of major faults	All basins	50	0.4731	0.885743	1.49875	2.1309	4.00771	1.65245	0.871321
	Basins with A < 200 km2	36	0.4731	0.769692	1.31598	2.0144	4.00771	1.46589	0.817578
	Basins with A < 200 km2, dominated by siliciclastic sedimentary rocks	15	0.699563	1.28526	1.86433	2.16925	4.00771	1.91015	0.86706
	Basins with A < 200 km2, dominated by mixed composition sedimentary rocks	8	0.529024	0.730938	1.70613	2.09501	2.39416	1.49842	0.741551
	Basins with A < 200 km2, dominated by plutonic rocks	7	0.515584	0.665572	0.874086	1.31587	2.07037	1.02635	0.549501
Greater than 15 km from major faults	All basins	61	0.231135	0.447377	0.681099	0.991508	2.91333	0.874302	0.621397
	Basins with A < 200 km2	59	0.231135	0.437688	0.665888	0.958119	2.91333	0.839119	0.599483
	Basins with A < 200 km2, dominated by siliciclastic sedimentary rocks	41	0.231135	0.424601	0.665888	0.882692	2.80868	0.830658	0.591314
	Basins with A < 200 km2, dominated by mixed composition sedimentary rocks	10	0.264352	0.452221	0.746202	0.960215	2.91333	0.961852	0.800169
	Basins with A < 200 km2, dominated by plutonic rocks	4	0.283971	0.349767	0.495645	0.71721	0.858694	0.533489	0.247459

## Sheet: Table S9
Table S9. F-test and t-test results
A. t-tests for K from basins with Dmf ≤ 15 and >15 km
Basins used for testing	Criterion based on 2008 Wenchuan EQ	number of basins with D≤15 km	number of basins with D>15 km	H0: K1 from D ≤15 km == K2 from D> 15 km	p-value	K1/K2
						mean	2 s.d.
All basins	No	50	61	1	8.61015e-07	1.89002	0.333497
Basins with A < 200 km2	No	36	59	1	0.000187076	1.74694	0.374602
Basins with A < 200 km2, dominated by siliciclastic sedimentary rocks	No	15	41	1	0.000270711	2.29956	0.610256
Basins with A < 200 km2, dominated by mixed composition sedimentary rocks	No	8	10	0	0.160758	1.55785	0.804772
Basins with A < 200 km2, dominated by plutonic rocks	No	7	4	0	0.0726324	1.92385	1.02871
All basins	sampled before 2008	24	43	1	0.00584732	1.50761	0.353796
Basins with A < 200 km2	sampled before 2008	20	42	1	0.00953807	1.52492	0.388354
Basins with A < 200 km2, dominated by siliciclastic sedimentary rocks	sampled before 2008	3	29	0	0.079235	2.23384	1.53603
Basins with A < 200 km2, dominated by mixed composition sedimentary rocks	sampled before 2008	4	6	0	0.349465	1.44247	1.14546
Basins with A < 200 km2, dominated by plutonic rocks	sampled before 2008	7	4	0	0.0726324	1.92385	1.02871
All basins	sampled before 2008, basins without pga > 0.34g	44	61	1	2.83632e-05	1.75765	0.338614
Basins with A < 200 km2	sampled before 2008, basins without pga > 0.34g	36	59	1	0.000187076	1.74694	0.374602
Basins with A < 200 km2, dominated by siliciclastic sedimentary rocks	sampled before 2008, basins without pga > 0.34g	15	41	1	0.000270711	2.29956	0.610256
Basins with A < 200 km2, dominated by mixed composition sedimentary rocks	sampled before 2008, basins without pga > 0.34g	8	10	0	0.160758	1.55785	0.804772
Basins with A < 200 km2, dominated by plutonic rocks	sampled before 2008, basins without pga > 0.34g	7	4	0	0.0726324	1.92385	1.02871
B. t-test for basins with different lithologiesa
Basins used for testing	H0: Kss == Kp	p-value	H0: Kss == Kmx	p-value	H0: Kp == Kmx	p-value
Basins with A < 200 km2, Dmf <=15 km	1	0.00976153	0	0.182154	0	0.249226
Basins with A < 200 km2, Dmf > 15 km	0	0.0950242	0	0.15465	0	0.63536
Basins with A < 200 km2	0	0.164195	0	0.15869	0	0.715024
C. F-tests for model improvemmentsb
Basins used for testing		F statistics	p-value
Basins with A < 200 km2	H0: K vs K ~ f (lithology)	0.6114	0.545
Basins with A < 200 km2	H0: K vs K~ f (Dmf)	9.14278	0.00332172
Basins with A < 200 km2	H0: K~ f (Dmf) vs K ~ f (Dmf, lithology)	1.87172	0.123622
a ss, mx, p refer to siliciclastic sedimentary, mixed composition sedimentary, and plutonic rock.
b Dmf indicates the distance to major faults

[truncated: 1 more sheets: Table S10]
